# Supplementary material
Source: Springer Nature journal article supplement (https://www.springermedizin.de/resource/supplementary/12936_2012_2045_MOESM2_ESM.pdf/9543474)

Coartem

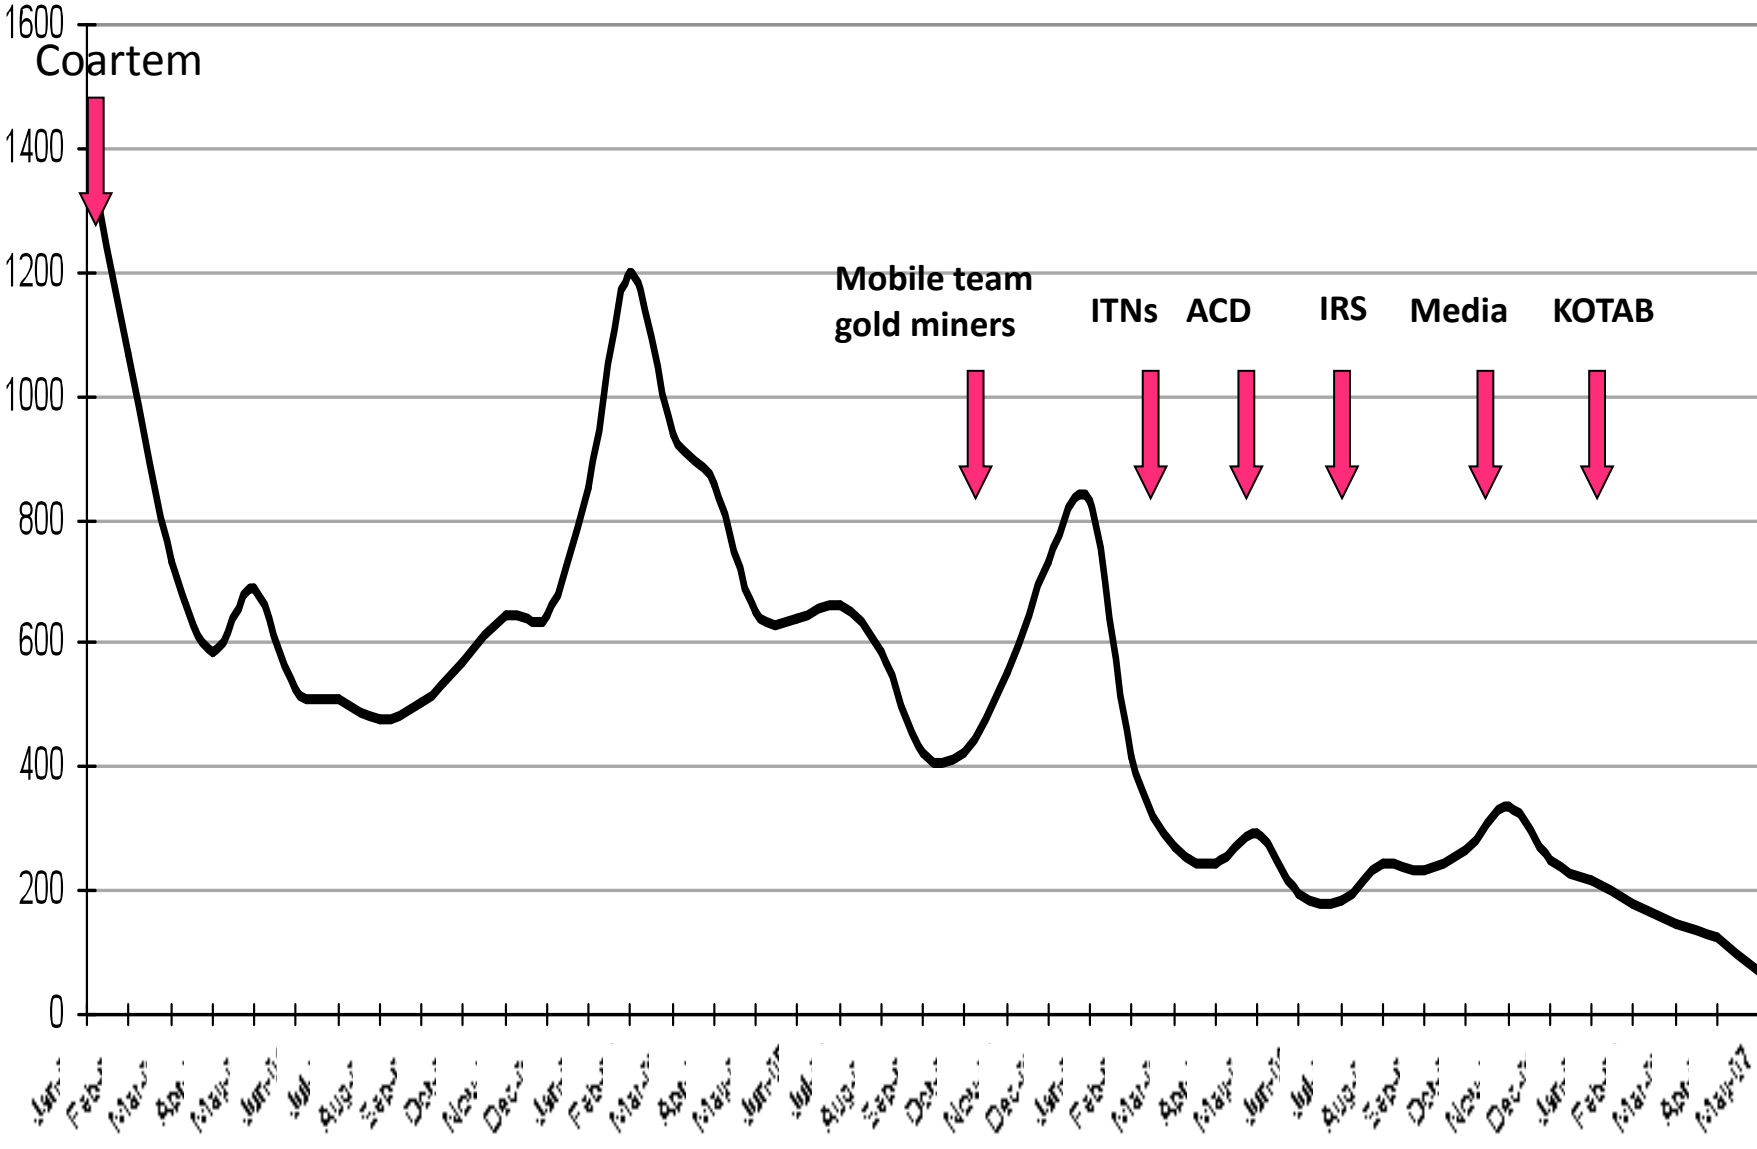

Mobile team  
gold miners

ITNs

ACD

IRS

Media

KOTAB

Supplement: MOESM2 [file 9543474]
